# Supplementary material for: HrpL Regulon of Bacterial Pathogen of Woody Host Pseudomonas savastanoi pv. savastanoi NCPPB 3335
Source: MDPI journal article supplement (doi:10.3390/microorganisms9071447), 2021-07-05
Supplement: s1 [file s1]

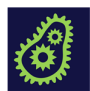

## Article

# HrpL Regulon of Bacterial Pathogen of Woody Host *Pseudomonas savastanoi* pv. *savastanoi* NCPPB 3335

Alba Moreno-Pérez <sup>1,2</sup>, Cayo Ramos <sup>1,2,\*</sup> and Luis Rodríguez-Moreno <sup>1,2,\*</sup>

<sup>1</sup> Área de Genética, Facultad de Ciencias, Campus Teatinos s/n, Universidad de Málaga, E-29010 Málaga, Spain; albamp@uma.es

<sup>2</sup> Departamento de Microbiología y Protección de Cultivos, Instituto de Hortofruticultura Subtropical y Mediterránea «La Mayora», Extensión Campus de Teatinos, Universidad de Málaga-Consejo Superior de Investigaciones Científicas (IHSM-UMA-CSIC), 29010 Málaga, Spain

\* Correspondence: crr@uma.es (C.R.); lgrodriguez@uma.es (L.R.-M.); Tel.: +34-952-132146 (C.R.); Tel.: +34-952132131 (L.R.-M.)

## Supplementary Material

**Figure S1.** HrpL-dependent expression of HrpL regulon genes by RT-qPCR. Quantitative reverse-transcription polymerase chain reaction with the indicated *P. savastanoi* pv. *savastanoi* NCPPB 3335 genes for its  $\Delta hrpL$  mutant vs. wild-type (WT) strain at 6 h after transfer to Hrp-inducing medium. Fold change (fc) was calculated after normalization using the *gyrA* gene as an internal control. Results represent the means for two biological replicates. Error bars represent the standard deviation. Asterisks indicate a significantly different value from one, established by a T-Student test ( $P < 0.05$ ), which indicate a significant decrease in the expression of these genes in the  $\Delta hrpL$  mutant compared with WT strain.

**Figure S2.** Gene expression analysis of biological replicates used in RNA-seq study. The boxplot displays distribution of normalized expression values ( $\log_{10}$  FPKM) among the two biological replicates of the *P. savastanoi* pv. *savastanoi* NCPPB 3335 and its  $\Delta hrpL$  mutant.

**Table S1.** Strains used in this study.

**Table S2.** Plasmids used in this study.

**Table S3.** List and application of primers used in this work.

**Table S4.** Reads obtained in RNA-seq.

**Table S5.** Summary of Illumina RNA-seq data.

**Table S6.** Genes shared by in vitro and in silico analysis.

**Table S7.** Structural genes of T3SS and genes associated with T3SS under regulation of HrpL in *P. savastanoi* pv. *savastanoi* NCPPB 3335.

**Table S8.** T3E genes under regulation of HrpL in *P. savastanoi* pv. *savastanoi* NCPPB 3335.

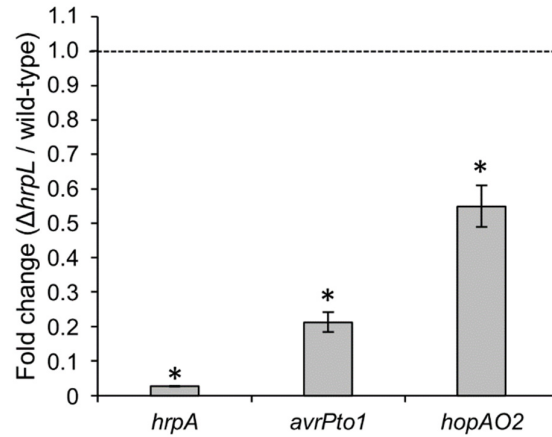

**Figure S1.** HrpL-dependent expression of HrpL regulon genes by RT-qPCR. Quantitative reverse-transcription polymerase chain reaction with the indicated *P. savastanoi* pv. *savastanoi* NCPPB 3335 genes for its  $\Delta hrpL$  mutant vs. wild-type (WT) strain at 6 h after transfer to Hrp-inducing medium. Fold change (fc) was calculated after normalization using the *gyrA* gene as an internal control. Results represent the means for two biological replicates. Error bars represent the standard deviation. Asterisks indicate a significantly different value from one, established by a T-Student test ( $P < 0.05$ ), which indicate a significant decrease in the expression of these genes in the  $\Delta hrpL$  mutant compared with WT strain.

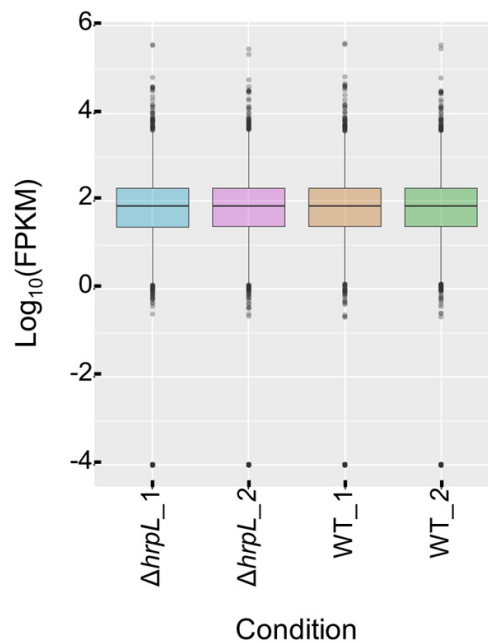

**Figure S2.** Gene expression analysis of biological replicates used in RNA-seq study. The boxplot displays distribution of normalized expression values (log<sub>10</sub> FPKM) among the two biological replicates of *P. savastanoi* pv. *savastanoi* NCPPB 3335 and its  $\Delta hrpL$  mutant.

**Table S1.** Strains used in this study.

| Strain                                             | Main features                                                                                                                                                                                                                                                                                                                                            | Reference or source |
|----------------------------------------------------|----------------------------------------------------------------------------------------------------------------------------------------------------------------------------------------------------------------------------------------------------------------------------------------------------------------------------------------------------------|---------------------|
| <b><i>Escherichia coli</i></b>                     |                                                                                                                                                                                                                                                                                                                                                          |                     |
| DH5α                                               | <i>F</i> -, $\phi$ 80 $\Delta$ lacZ M15, ( <i>lacZYA-argF</i> ) U169, <i>deoR</i> , <i>recA1</i> , <i>endA</i> , <i>hsdR17</i> ( <i>rk</i> - <i>mk</i> -), <i>phoA</i> , <i>supE44</i> , <i>thi-1</i> , <i>gyrA96</i> , <i>relA1</i>                                                                                                                     | [1]                 |
| GM2929                                             | <i>F</i> -, <i>ara-14</i> , <i>leuB6</i> , <i>thi-1</i> , <i>tonA31</i> , <i>lacY1</i> , <i>tsx-78</i> , <i>galK2</i> , <i>galT22</i> , <i>glnV44</i> , <i>hisG4</i> , <i>rpsL136</i> , <i>xyl-5</i> , <i>mtl-1</i> , <i>dam13::Tn9</i> , <i>dcm-6</i> , <i>mcrB1</i> , <i>hsdR2</i> , <i>mcrA</i> , <i>recF143</i> (Sp <sup>R</sup> , Cm <sup>R</sup> ) | [2]                 |
| <b><i>Pseudomonas</i></b>                          |                                                                                                                                                                                                                                                                                                                                                          |                     |
| <b><i>P. savastanoi</i> pv. <i>savastanoi</i></b>  |                                                                                                                                                                                                                                                                                                                                                          |                     |
| NCPPB 3335                                         | Wild-type strain isolated from olive                                                                                                                                                                                                                                                                                                                     | [3]                 |
| NCPPB 3335 $\Delta$ <i>hrpL::nptII</i>             | <i>hrpL</i> mutant derived from NCPPB 3335 with Km resistance <i>nptII</i> cassette (Km <sup>R</sup> )                                                                                                                                                                                                                                                   | [4]                 |
| NCPPB 3335 $\Delta$ <i>hrpL</i>                    | <i>hrpL</i> mutant derived from NCPPB 3335 $\Delta$ <i>hrpL::nptII</i>                                                                                                                                                                                                                                                                                   | This work           |
| <b><i>P. savastanoi</i> pv. <i>nerii</i></b>       |                                                                                                                                                                                                                                                                                                                                                          |                     |
| <i>Psn23</i> (ESC23)                               | Wild-type strain isolated from oleander                                                                                                                                                                                                                                                                                                                  | [5]                 |
| <i>Psn23</i> $\Delta$ <i>hrpL::nptII</i>           | <i>hrpL</i> mutant derived from <i>Psn23</i> with Km resistance <i>nptII</i> cassette (Km <sup>R</sup> )                                                                                                                                                                                                                                                 | This work           |
| <i>Psn23</i> $\Delta$ <i>hrpL</i>                  | <i>hrpL</i> mutant derived from <i>Psn23</i> $\Delta$ <i>hrpL::nptII</i>                                                                                                                                                                                                                                                                                 | This work           |
| <b><i>P. savastanoi</i> pv. <i>mandevillae</i></b> |                                                                                                                                                                                                                                                                                                                                                          |                     |
| Ph3 (CFBP 8832)                                    | Wild-type strain isolated from dipladenia                                                                                                                                                                                                                                                                                                                | [6]                 |
| Ph3 $\Delta$ <i>hrpL::nptII</i>                    | <i>hrpL</i> mutant derived from Ph3 with Km resistance <i>nptII</i> cassette (Km <sup>R</sup> )                                                                                                                                                                                                                                                          | This work           |
| Ph3 $\Delta$ <i>hrpL</i>                           | <i>hrpL</i> mutant derived from Ph3 $\Delta$ <i>hrpL::nptII</i>                                                                                                                                                                                                                                                                                          | This work           |
| <b><i>P. savastanoi</i> pv. <i>fraxini</i></b>     |                                                                                                                                                                                                                                                                                                                                                          |                     |
| NCPPB 1006                                         | Wild-type strain isolated from ash                                                                                                                                                                                                                                                                                                                       | [7]                 |
| NCPPB 1006 $\Delta$ <i>hrpL::nptII</i>             | <i>hrpL</i> mutant derived from NCPPB 1006 with Km resistance <i>nptII</i> cassette (Km <sup>R</sup> )                                                                                                                                                                                                                                                   | This work           |
| NCPPB 1006 $\Delta$ <i>hrpL</i>                    | <i>hrpL</i> mutant derived from NCPPB 1006 $\Delta$ <i>hrpL::nptII</i>                                                                                                                                                                                                                                                                                   | This work           |
| <b><i>P. savastanoi</i> pv. <i>retacarpa</i></b>   |                                                                                                                                                                                                                                                                                                                                                          |                     |
| CECT 4861                                          | Wild-type strain isolated from broom                                                                                                                                                                                                                                                                                                                     | [8]                 |
| CECT 4861 $\Delta$ <i>hrpL::nptII</i>              | <i>hrpL</i> mutant derived from CECT 4861 with Km resistance <i>nptII</i> cassette (Km <sup>R</sup> )                                                                                                                                                                                                                                                    | This work           |
| CECT 4861 $\Delta$ <i>hrpL</i>                     | <i>hrpL</i> mutant derived from CECT 4861 $\Delta$ <i>hrpL::nptII</i>                                                                                                                                                                                                                                                                                    | This work           |
| <b><i>P. syringae</i> pv. <i>tomato</i></b>        |                                                                                                                                                                                                                                                                                                                                                          |                     |
| DC3000                                             | Wild-type strain isolated from tomato                                                                                                                                                                                                                                                                                                                    | [9]                 |
| <b><i>P. syringae</i> pv. <i>tabaci</i></b>        |                                                                                                                                                                                                                                                                                                                                                          |                     |
| CFBP 1621                                          | Wild-type strain isolated from tobacco                                                                                                                                                                                                                                                                                                                   | [10]/W.S. Beach     |

Sp, spectinomycin; Cm, chloramphenicol; Km, kanamycin.

**Table S2.** Plasmids used in this study.

| Name     | Description                                                                                                                                                                    | Reference      |
|----------|--------------------------------------------------------------------------------------------------------------------------------------------------------------------------------|----------------|
| pGEM-T   | Cloning vector containing ori f1 and <i>lacZ</i> (Ap <sup>R</sup> )                                                                                                            | (Promega, USA) |
| pIAC4-Km | pGEM-T derivate, contains approximately 1.2 kb on each side of the <i>P. savastanoi</i> pv. <i>savastanoi</i> NCPPB 3335 <i>hrpL</i> gene (Ap <sup>R</sup> , Km <sup>R</sup> ) | [4]            |
| pFLP2    | Contains a Flp recombinase (flipase) gene and <i>sacB</i> (Ap <sup>R</sup> )                                                                                                   | [11]           |

Ap, ampicillin; Km, kanamycin.

**Table S3.** List and application of primers used in this work.

| Purpose                                     | Name                | Sequence (5'→3')          |
|---------------------------------------------|---------------------|---------------------------|
| <i>hrpL</i> probe <sup>a</sup>              | <i>hrpL</i> F-29    | CCTAGTGATCCTTGATGC        |
|                                             | <i>hrpL</i> R-381   | CAAGCAATCAATGGCTGC        |
| <i>nptII</i> probe                          | <i>nptII</i> F      | GTGTAGGCTGGAGCTGCTTC      |
|                                             | <i>nptII</i> R      | TTGCATCAGCCATGATGG        |
| Checking for genomic cleanliness of the RNA | <i>catB</i> R1004   | GCTCGACCAGAATGTCTTCG      |
|                                             | <i>catB</i> F516    | CAAGCTGAAGATCGGTGCC       |
| Real time quantitative PCR                  | <i>gyrA</i> F-180   | GAGCGAGCTGGGTAACGACTGGAAC |
|                                             | <i>gyrA</i> R-329   | CAGCGTTGTGCCATCGACCGAA    |
|                                             | <i>hrpA</i> F-93    | ATCAACAGCGTCAAGAGCAG      |
|                                             | <i>hrpA</i> R-267   | ATTTGGTTGGAAAGGGCTTC      |
|                                             | <i>avrPto</i> F-295 | GACAGGAGAGTCAGGAGTAAACC   |
|                                             | <i>avrPto</i> R-430 | AGATCCGCTTGGGTTCATAG      |
|                                             | <i>hopAO2</i> -F    | TGCGTTTGATGGTGACCGA       |
|                                             | <i>hopAO2</i> -R    | ACCGCAATGGATATGTACCCG     |

<sup>a</sup> These primers were also used to perform the verification of the possible mutant colonies obtained by PCR.

**Table S4.** Reads obtained in RNA-seq.

| Sample                                               | Raw reads   | Clean reads <sup>a</sup> | Reads mapped to reference (%)<br><sup>b</sup> |
|------------------------------------------------------|-------------|--------------------------|-----------------------------------------------|
| <b>Psv NCPPB 3335</b>                                |             |                          |                                               |
| Replicate 1                                          | 41,289,538  | 33,083,850 (80.13%)      | 99.75                                         |
| Replicate 2                                          | 40,704,762  | 33,925,884 (83.35%)      | 99.60                                         |
| Total                                                | 81,994,300  | 67,009,734 (81.72%)      | 99.67                                         |
| <b>Psv NCPPB 3335 <math>\Delta</math><i>hrpL</i></b> |             |                          |                                               |
| Replicate 1                                          | 47,862,912  | 40,450,444 (84.51%)      | 99.67                                         |
| Replicate 2                                          | 47,974,950  | 40,705,092 (84.85%)      | 99.65                                         |
| Total                                                | 95,837,862  | 81,155,536 (84.68%)      | 99.66                                         |
| <b>Total RNA-seq</b>                                 | 177,832,162 | 148,165,270 (83.32%)     | 99.67                                         |

<sup>a</sup> Clean reads and percentage of accepted reads obtained after preprocessing with SeqTrimNext. <sup>b</sup> Percentage of clean reads that mapped with fully closed reference genome of *P. savastanoi* pv. *savastanoi* NCPPB 3335 including its native plasmids, pPsv48A, pPsv48B, and pPsv48C.

**Table S5.** Summary of Illumina RNA-seq data.

|            | Psv NCPPB 3335 |             | Psv NCPPB 3335 $\Delta$ <i>hrpL</i> |             |
|------------|----------------|-------------|-------------------------------------|-------------|
|            | Replicate 1    | Replicate 2 | Replicate 1                         | Replicate 2 |
| Technology | Illumina       | Illumina    | Illumina                            | Illumina    |

|                               |           |                    |           |           |
|-------------------------------|-----------|--------------------|-----------|-----------|
| Read length (nt)              | 75        | 75                 | 75        | 75        |
| Phred score (% $\geq$ Q30)    | >88%      | >88%               | >88%      | >89%      |
| Genome size (bp)              | 6,143,577 | 6,143,577          | 6,143,022 | 6,143,022 |
| Sequencing depth <sup>a</sup> | 344.2     | 351.6              | 420.8     | 423.5     |
| CDS in chromosome             | 5597      | 5597               | 5596      | 5596      |
| % CDS covered by reads        | 99.18     | 99.18              | 99.27     | 99.29     |
| CDS in plasmids               | 172       | 172                | 172       | 172       |
| % CDS covered by reads        | 100.00    | 99.42 <sup>b</sup> | 100.00    | 100.00    |

<sup>a</sup>Sequencing depth was defined as number of nucleotides used for analysis divided by the genome size plus the three plasmids. <sup>b</sup>A CDS (coding sequence) from plasmid pPsv48C was not covered.

**Table S6.** Genes shared by in vitro and in silico analysis.

| Accession number <sup>a</sup>           | Protein ID <sup>a</sup> | Length <sup>b</sup> | Annotation                                                       | Gene           |
|-----------------------------------------|-------------------------|---------------------|------------------------------------------------------------------|----------------|
| <b>Type III secretion system (T3SS)</b> |                         |                     |                                                                  |                |
| PSA3335_RS10675                         | WP_002552422.1          | 368                 | YopN family type III secretion system gatekeeper subunit         | <i>hrpJ</i>    |
| PSA3335_RS10620                         | WP_004666089.1          | 359                 | EscU/YscU/HrcU family type III secretion system export apparatus | <i>hrcU</i>    |
|                                         |                         |                     | switch protein                                                   |                |
| PSA3335_RS10600                         | WP_002552409.1          | 67                  | Hypothetical protein                                             | <i>hrpT</i>    |
| PSA3335_RS10590                         | WP_080393802.1          | 146                 | Type III secretion protein                                       | <i>hrpG</i>    |
| PSA3335_RS10585                         | WP_002552406.1          | 74                  | Type III secretion protein                                       | <i>hrpF</i>    |
| PSA3335_RS10560                         | WP_002552401.1          | 347                 | Type III secretion system helper protein                         | <i>hrpZ</i>    |
| PSA3335_RS10555                         | WP_002552400.1          | 108                 | Membrane protein                                                 | <i>hrpA</i>    |
| <b>Helpers T3SS</b>                     |                         |                     |                                                                  |                |
| PSA3335_RS07245                         | WP_002554797.1          | 524                 | Two-domain harpin                                                | <i>hopAK1</i>  |
| PSA3335_RS15920                         | WP_004665222.1          | 96                  | Type III chaperone protein ShcV                                  | <i>ShcV</i>    |
| PSA3335_RS25240                         | WP_031597912.1          | 131                 | Type III chaperone protein ShcF                                  | <i>ShcF</i>    |
| <b>T3SS effectors</b>                   |                         |                     |                                                                  |                |
| PSA3335_RS01620                         | WP_002551447.1          | 162                 | Hypothetical protein                                             | <i>avrPto1</i> |
| PSA3335_RS25235                         | WP_002556083.1          | 223                 | Hypothetical protein                                             | <i>avrRpm2</i> |
| PSA3335_RS02535                         | WP_002556043.1          | 257                 | Hypothetical protein                                             | <i>hopAB1</i>  |
| PSA3335_RS20790                         | Pseudogene              | 110                 | DUF1826 domain-containing protein                                | <i>hopAZ1</i>  |
| PSA3335_RS02560                         | Pseudogene              | 1712                | Type III effector protein XopAD                                  | <i>xopAD</i>   |
| <b>Hypothetical proteins</b>            |                         |                     |                                                                  |                |
| PSA3335_RS02555                         | WP_080719001.1          | 61                  | Hypothetical protein                                             | <i>HP02555</i> |
| PSA3335_RS29775                         | Pseudogene              | 40                  | Hypothetical protein                                             | <i>HP29775</i> |
| <b>Signaling</b>                        |                         |                     |                                                                  |                |
| PSA3335_RS05360                         | WP_031599113.1          | 212                 | Hypothetical protein                                             | <i>HP05360</i> |
| <b>Secondary metabolism</b>             |                         |                     |                                                                  |                |
| PSA3335_RS20310                         | WP_002552885.1          | 343                 | FAD: protein FMN transferase                                     | <i>HP20310</i> |

<sup>a</sup> Accession number and protein ID in NCBI (<https://www.ncbi.nlm.nih.gov/>). <sup>b</sup>Length in amino acids.

**Table S7.** Structural genes of T3SS and genes associated with T3SS under regulation of HrpL in *P. savastanoi* pv. *savastanoi* NCPPB 3335.

| Accession number <sup>a</sup> | Gene         | O <sup>b</sup> | RNA-seq <sup>c</sup> |                       |      | <i>hrp</i><br>value <sup>d</sup> | HrpL dependence in other<br>pathovars <sup>e</sup> |     |     |     |     |  |
|-------------------------------|--------------|----------------|----------------------|-----------------------|------|----------------------------------|----------------------------------------------------|-----|-----|-----|-----|--|
|                               |              |                | <i>q</i> value       | Log <sub>2</sub> (fc) | Pto  |                                  | Pph                                                | Psy | Pla | Pja | Por |  |
| T3SS pilus                    |              |                |                      |                       |      |                                  |                                                    |     |     |     |     |  |
| PSA3335_RS10685               | <i>hrpK</i>  | 1              | 0.006                | 2.93                  | nd   |                                  |                                                    |     |     |     |     |  |
| PSA3335_RS10680               | <i>hrpL</i>  | 1              | 0.006                | #                     | nd   |                                  |                                                    |     |     |     |     |  |
| PSA3335_RS10675               | <i>hrpJ</i>  | 1              | 0.006                | -4.34                 | 2779 |                                  |                                                    |     |     |     |     |  |
| PSA3335_RS10670               | <i>hrcV</i>  | 2              | 0.006                | -2.81                 |      |                                  |                                                    |     |     |     |     |  |
| PSA3335_RS10665               | <i>hrpQ</i>  | 3              | 0.006                | -2.93                 |      |                                  |                                                    |     |     |     |     |  |
| PSA3335_RS10660               | <i>hrcN</i>  | 4              | 0.006                | -2.70                 |      |                                  |                                                    |     |     |     |     |  |
| PSA3335_RS10655               | <i>hrpO</i>  | 5              | 0.006                | -4.48                 |      |                                  |                                                    |     |     |     |     |  |
| PSA3335_RS10650               | <i>hrpP</i>  | 1              | 0.006                | -3.49                 |      | nd                               |                                                    |     |     |     |     |  |
| PSA3335_RS10645               | <i>hrcQA</i> | 2              | 0.006                | -4.06                 |      | 2585                             |                                                    |     |     |     |     |  |
| PSA3335_RS10640               | <i>hrcQB</i> | 3              | 0.006                | -3.59                 |      |                                  |                                                    |     |     |     |     |  |
| PSA3335_RS10635               | <i>hrcR</i>  | 4              | 0.006                | -2.04                 |      |                                  |                                                    |     |     |     |     |  |
| PSA3335_RS10630               | <i>hrcS</i>  | 5              | NS                   | -4.15                 |      |                                  |                                                    |     |     |     |     |  |
| PSA3335_RS10625               | <i>hrcT</i>  | 6              | 0.006                | -1.71                 |      |                                  |                                                    |     |     |     |     |  |
| PSA3335_RS10620               | <i>hrcU</i>  | 6              | 0.006                | -1.92                 |      |                                  |                                                    |     |     |     |     |  |
| PSA3335_RS10605               | <i>hrpV</i>  | 5              | 0.006                | -1.18                 |      |                                  |                                                    |     |     |     |     |  |
| PSA3335_RS10600               | <i>hrpT</i>  | 4              | 0.022                | -2.34                 |      |                                  |                                                    |     |     |     |     |  |
| PSA3335_RS10595               | <i>hrcC</i>  | 3              | 0.006                | -2.40                 |      |                                  |                                                    |     |     |     |     |  |
| PSA3335_RS10590               | <i>hrpG</i>  | 2              | 0.006                | -3.67                 | 2796 |                                  |                                                    |     |     |     |     |  |
| PSA3335_RS10585               | <i>hrpF</i>  | 1              | 0.006                | -3.16                 | 2796 |                                  |                                                    |     |     |     |     |  |
| PSA3335_RS10580               | <i>hrpE</i>  | 6              | 0.006                | -1.73                 |      |                                  |                                                    |     |     |     |     |  |
| PSA3335_RS10575               | <i>hrpD</i>  | 5              | 0.006                | -1.32                 |      |                                  |                                                    |     |     |     |     |  |
| PSA3335_RS10570               | <i>hrcJ</i>  | 4              | 0.006                | -1.79                 |      |                                  |                                                    |     |     |     |     |  |
| PSA3335_RS10565               | <i>hrpB</i>  | 3              | 0.006                | -2.16                 |      |                                  |                                                    |     |     |     |     |  |
| PSA3335_RS10560               | <i>hrpZ</i>  | 2              | 0.006                | -2.60                 |      | 2739                             |                                                    |     |     |     |     |  |
| PSA3335_RS10555               | <i>hrpA</i>  | 1              | 0.006                | -3.68                 |      | 2739                             |                                                    |     |     |     |     |  |
| PSA3335_RS10550               | <i>hrpS</i>  | 2              | NS                   | 0.03                  |      |                                  |                                                    |     |     |     |     |  |
| PSA3335_RS10545               | <i>hrpR</i>  | 1              | NS                   | 0.00                  |      |                                  |                                                    |     |     |     |     |  |

<sup>a</sup> Accession number in NCBI (<https://www.ncbi.nlm.nih.gov/>). <sup>b</sup> O, operon. Number indicates order of gene within the operon (from 5' to 3'). Blue shading indicates first gene of operon and individually transcribed genes. <sup>c</sup> Genes identified by RNA-seq. Significantly differentially expressed genes have *q* values < 0.05; NS, not significant. Fold change (fc) refers to average expression rate obtained in  $\Delta hrpL$  mutant relative to wild-type strain in two biological replicates. Negative (red) and positive (green) log<sub>2</sub> (fc) correspond to genes downregulated and upregulated, respectively, in  $\Delta hrpL$  mutant relative to wild-type strain. #, indicates that the expression in the  $\Delta hrpL$  mutant is zero. <sup>d</sup> Bioinformatic prediction of putative *hrp*-box upstream of start codon of genes encoded in *P. savastanoi* pv. *savastanoi* NCPPB 3335 genome (*hrp* value  $\geq$  2500); nd, not detected. <sup>e</sup> Red box, strains in which activation by HrpL of a homologous protein was identified by RNA-seq [12,13]. Pto, Pph, Psy, Pla, Pja, and Por: *P. syringae* pv. *tomato* DC3000, *P. syringae* pv. *phaseolicola* 1448A, *P. syringae* pv. *syringae* B728A, *P. syringae* pv. *lachrymans* 107, *P. syringae* pv. *japonica* MAFF 301072, and *P. syringae* pv. *oryzae* 1\_6, respectively.

**Table S8.** T3Es genes under regulation of HrpL in *P. savastanoi* pv. *savastanoi* NCPPB 3335.

| Accession number <sup>a</sup> | Gene                         | RNA-seq <sup>c</sup> |                       | <i>hrp</i> value <sup>d</sup> | EffectiveDB <sup>e</sup> | HrpL dependence in other pathovars <sup>f</sup> |     |     |     |     |     |
|-------------------------------|------------------------------|----------------------|-----------------------|-------------------------------|--------------------------|-------------------------------------------------|-----|-----|-----|-----|-----|
|                               |                              | <i>q</i> value       | Log <sub>2</sub> (fc) |                               |                          | Pto                                             | Pph | Psy | Pla | Pja | Por |
|                               |                              |                      |                       |                               |                          |                                                 |     |     |     |     |     |
| Known T3Es                    |                              |                      |                       |                               |                          |                                                 |     |     |     |     |     |
| PSA3335_RS10535*              | <i>avrE1</i>                 |                      | NS                    | nd                            | 0.999                    |                                                 |     |     |     |     |     |
| PSA3335_RS01620               | <i>avrPto1</i> <sup>b</sup>  | 0.006                | -2.21                 | 2832                          | 1.000                    |                                                 |     |     |     |     |     |
| PSA3335_RS25235               | <i>avrRpm2</i>               | 0.006                | -0.77                 | 2699                          | 1.000                    |                                                 |     |     |     |     |     |
| PSA3335_RS05460               | <i>hopA1</i>                 |                      | NS                    | nd                            | nd                       |                                                 |     |     |     |     |     |
| PSA3335_RS10695               | <i>hopA2</i>                 | 0.006                | 1.28                  | nd                            | nd                       |                                                 |     |     |     |     |     |
| PSA3335_RS10490               | <i>hopAA1</i>                | 0.006                | -2.29                 | 2728                          | nd                       |                                                 |     |     |     |     |     |
| PSA3335_RS02535               | <i>hopAB1</i>                | 0.006                | -0.87                 | 2591                          | 0.999                    |                                                 |     |     |     |     |     |
| PSA3335_RS24240               | <i>hopAE1</i>                | 0.006                | -1.16                 | nd                            | 1.000                    |                                                 |     |     |     |     |     |
| PSA3335_RS29755*              | <i>hopAF1-1</i>              |                      | NS                    | nd                            | 1.000                    |                                                 |     |     |     |     |     |
| PSA3335_A0028                 | <i>hopAF1-1</i> <sup>b</sup> |                      | NS                    | nd                            | 1.000                    |                                                 |     |     |     |     |     |
| PSA3335_RS29760*              | <i>hopAF1-2</i> <sup>b</sup> |                      | NS                    | nd                            | nd                       |                                                 |     |     |     |     |     |
| PSA3335_RS14505               | <i>hopAH2</i>                |                      | NS                    | nd                            | 1.000                    |                                                 |     |     |     |     |     |
| PSA3335_RS24880               | <i>hopAJ2</i>                |                      | NS                    | nd                            | nd                       |                                                 |     |     |     |     |     |
| PSPSV_B0010                   | <i>hopAO1</i> <sup>b</sup>   | 0.006                | -0.59                 | nd                            | nd                       |                                                 |     |     |     |     |     |
| PSA3335_RS12020               | <i>hopAO2</i> <sup>b</sup>   |                      | NS                    | 2579                          | nd                       |                                                 |     |     |     |     |     |
| PSA3335_RS02305*              | <i>hopAS1</i>                |                      | NS                    | nd                            | nd                       |                                                 |     |     |     |     |     |
| Not available                 | <i>hopAT1</i>                |                      | NS                    | nd                            | nd                       |                                                 |     |     |     |     |     |
| PSA3335_RS12045*              | <i>hopAU1</i>                | 0.006                | -0.84                 | nd                            | nd                       |                                                 |     |     |     |     |     |
| PSA3335_RS20790*              | <i>hopAZ1</i>                | 0.006                | -1.53                 | 2770                          | nd                       |                                                 |     |     |     |     |     |
| PSA3335_RS19200               | <i>hopBK1</i> <sup>b</sup>   |                      | NS                    | nd                            | nd                       |                                                 |     |     |     |     |     |
| PSA3335_RS02885*              | <i>hopBL1</i> <sup>b</sup>   |                      | NS                    | nd                            | nd                       |                                                 |     |     |     |     |     |
| PSA3335_RS03825*              | <i>hopBL2</i> <sup>b</sup>   |                      | NS                    | nd                            | nd                       |                                                 |     |     |     |     |     |
| PSA3335_RS02795               | <i>hopBM1</i>                |                      | NS                    | 2546                          | nd                       |                                                 |     |     |     |     |     |
| PSA3335_RS28230               | <i>hopD1</i>                 |                      | NS                    | nd                            | 1.000                    |                                                 |     |     |     |     |     |
| PSA3335_RS21975               | <i>hopG1</i>                 |                      | NS                    | 2634                          | 1.000                    |                                                 |     |     |     |     |     |
| PSA3335_RS24700               | <i>hopI1</i>                 | 0.006                | -1.02                 | nd                            | nd                       |                                                 |     |     |     |     |     |
| PSA3335_RS10525               | <i>hopM1</i>                 | 0.006                | -1.29                 | nd                            | nd                       |                                                 |     |     |     |     |     |
| PSA3335_RS28225               | <i>hopQ1</i>                 |                      | NS                    | 2554                          | 0.999                    |                                                 |     |     |     |     |     |
| PSA3335_RS28250               | <i>hopR1</i>                 | 0.006                | -0.60                 | nd                            | nd                       |                                                 |     |     |     |     |     |
| PSA3335_RS15915*              | <i>hopV1</i>                 | 0.006                | -1.80                 | nd                            | nd                       |                                                 |     |     |     |     |     |
| PSA3335_RS29445               | <i>hopW1</i>                 |                      | NS                    | nd                            | nd                       |                                                 |     |     |     |     |     |
| New putativeT3Es              |                              |                      |                       |                               |                          |                                                 |     |     |     |     |     |
| PSA3335_RS02560               | <i>xopAD</i>                 | 0.032                | -0.52                 | 2789                          | 1.000                    |                                                 |     |     |     |     |     |

<sup>a</sup> Accession number in NCBI (<https://www.ncbi.nlm.nih.gov/>). Asterisks indicate genes whose length in NCBI does not match which previously described in HopDatabase (<http://www.pseudomonas-syringae.org/>). <sup>b</sup> Genes whose HrpL dependency was previously demonstrated by RT-qPCR in *P. savastanoi* pv. *savastanoi* NCPPB 3335 [4,14,15]. <sup>c</sup> Genes identified by RNA-seq. Significantly differentially expressed genes have *q* values < 0.05; NS, not significant. Fold change (fc) refers to average expression rate obtained in

$\Delta hrpL$  mutant relative to wild-type strain in two biological replicates. Negative (red) and positive (green)  $\log_2$  (fc) correspond to genes downregulated and upregulated, respectively, in  $\Delta hrpL$  mutant relative to wild-type strain. <sup>d</sup> Bioinformatic prediction of putative *hrp*-box upstream of start codon of genes encoded in *P. savastanoi* pv. *savastanoi* NCPPB 3335 genome (*hrp* value  $\geq 2500$ ); nd, not detected. <sup>e</sup> EffectiveDB [16] provides values (0.999–1) for proteins in which N-terminal T3SS targeting pattern is detected; nd, not detected. <sup>f</sup> Red box, strains in which activation by HrpL of a homologous protein was identified by RNA-seq [12,13]. Pto, Pph, Psy, Pla, Pja, and Por: *P. syringae* pv. *tomato* DC3000, *P. syringae* pv. *phaseolicola* 1448A, *P. syringae* pv. *syringae* B728A, *P. syringae* pv. *lachrymans* 107, *P. syringae* pv. *japonica* MAFF 301072, and *P. syringae* pv. *oryzae* 1\_6, respectively.

## References

1. Hanahan, D. Studies on transformation of *Escherichia coli* with plasmids. *J. Mol. Biol.* **1983**, *166*, 557-580, doi:10.1016/s0022-2836(83)80284-8.
2. Bullock, W.O.; Fernandez, J.M.; Short, J.M. Xl1-Blue: a high efficiency plasmid transforming *recA* *Escherichia coli* strain with beta-galactosidase selection. *Biotechniques* **1987**, *5*, 376-378.
3. Pérez-Martínez, I.; Rodríguez-Moreno, L.; Matas, I.M.; Ramos, C. Strain selection and improvement of gene transfer for genetic manipulation of *Pseudomonas savastanoi* isolated from olive knots. *Res. Microbiol.* **2007**, *158*, 60-69, doi:10.1016/j.resmic.2006.09.008.
4. Matas, I.M.; Castañeda-Ojeda, M.P.; Aragón, I.M.; Antúnez-Lamas, M.; Murillo, J.; Rodríguez-Palenzuela, P.; López-Solanilla, E.; Ramos, C. Translocation and functional analysis of *Pseudomonas savastanoi* pv. *savastanoi* NCPPB 3335 type III secretion system effectors reveals two novel effector families of the *Pseudomonas syringae* complex. *Mol. Plant-Microbe Interact.* **2014**, *27*, 424-436, doi:10.1094/MPMI-07-13-0206-R.
5. Tegli, S.; Gori, A.; Cerboneschi, M.; Cipriani, M.G.; Sisto, A. Type three secretion system in *Pseudomonas savastanoi* pathovars: does timing matter? *Genes* **2011**, *2*, 957, doi:10.3390/genes2040957.
6. Eltlbany, N.; Prokscha, Z.-Z.; Castañeda-Ojeda, M.P.; Krögerrecklenfort, E.; Heuer, H.; Wohanka, W.; Ramos, C.; Smalla, K. A new bacterial disease on *Mandevilla sanderi*, caused by *Pseudomonas savastanoi*: lessons learned for bacterial diversity studies. *Appl. Environ. Microbiol.* **2012**, *78*, 8492-8497, doi:10.1128/AEM.02049-12.
7. Janse, J.D. The bacterial disease of ash (*Fraxinus excelsior*), caused by *Pseudomonas syringae* subsp. *savastanoi* pv. *fraxini*. II. Etiology and taxonomic considerations. *European Journal of Forest Pathology* **1981**, *11*, 425-438, doi:10.1111/j.1439-0329.1981.tb00115.x.
8. Álvarez, F.; García de los Ríos, J.E.; Jimenez, P.; Rojas, A.; Reche, P.; Troya, M.T. Phenotypic variability in different strains of *Pseudomonas syringae* subsp. *savastanoi* isolated from different hosts. *Eur. J. Plant Pathol.* **1998**, *104*, 603-609, doi:10.1023/A:1008604011154.
9. Cuppels, D.A. Generation and characterization of Tn5 insertion mutations in *Pseudomonas syringae* pv. *tomato*. *Appl. Environ. Microbiol.* **1986**, *51*, 323-327, doi:10.1128/AEM.51.2.323-327.1986.
10. Guillorit, C.; Samson, R. A Note: Serological study of four pathovars of *Pseudomonas syringae*: Ps. syr. aptata, Ps. syr. tabaci, Ps. syr. mors-prunorum and Ps. syr. phaseolicola. *J. Appl. Bacteriol.* **1993**, *74*, 683-687, doi:10.1111/j.1365-2672.1993.tb05203.x.
11. Hoang, T.T.; Karkhoff-Schweizer, R.R.; Kutchma, A.J.; Schweizer, H.P. A broad-host-range FLP-*FRT* recombination system for site-specific excision of chromosomally-located DNA sequences: application for isolation of unmarked *Pseudomonas aeruginosa* mutants. *Gene* **1998**, *212*, 77-86, doi:10.1016/S0378-1119(98)00130-9.
12. Mucyn, T.S.; Yourstone, S.; Lind, A.L.; Biswas, S.; Nishimura, M.T.; Baltrus, D.A.; Cumbie, J.S.; Chang, J.H.; Jones, C.D.; Dangl, J.L.; et al. Variable suites of non-effector genes are co-regulated in the type III secretion virulence regulon across the *Pseudomonas syringae* phylogeny. *PLoS Pathog.* **2014**, *10*, e1003807, doi:10.1371/journal.ppat.1003807.
13. Lam, H.N.; Chakravarthy, S.; Wei, H.L.; BuiNguyen, H.; Stodghill, P.V.; Collmer, A. Global analysis of the HrpL regulon in the plant pathogen *Pseudomonas syringae* pv. *tomato* DC3000 reveals new regulon members with diverse functions. *PLoS ONE* **2014**, *9*, e106115, doi:10.1371/journal.pone.0106115.



14. Castañeda-Ojeda, M.P.; Moreno-Pérez, A.; Ramos, C.; López-Solanilla, E. Suppression of plant immune responses by the *Pseudomonas savastanoi* pv. *savastanoi* NCPPB 3335 type III effector tyrosine phosphatases HopAO1 and HopAO2. *Front. Plant Sci.* **2017**, *8*, 680, doi:10.3389/fpls.2017.00680.
15. Castañeda-Ojeda, M.P.; López-Solanilla, E.; Ramos, C. Differential modulation of plant immune responses by diverse members of the *Pseudomonas savastanoi* pv. *savastanoi* HopAF type III effector family. *Mol. Plant Pathol.* **2017**, *18*, 625-634, doi:10.1111/mpp.12420.
16. Eichinger, V.; Nussbaumer, T.; Platzer, A.; Jehl, M.-A.; Arnold, R.; Rattei, T. EffectiveDB—updates and novel features for a better annotation of bacterial secreted proteins and type III, IV, VI secretion systems. *Nucleic Acids Res.* **2015**, *44*, D669-D674, doi:10.1093/nar/gkv1269.
